# Supplementary material for: Transfer Learning via Deep Neural Networks for Implant Fixture System Classification Using Periapical Radiographs
Source: PubMed Central journal article supplement (PMC7230319; doi:10.3390/jcm9041117), 2020-04-14
Supplement: jcm-09-01117-s001.pdf [file jcm-09-01117-s001.pdf]

**Table S1.** Test and validation accuracy according to multiple validation patience.

|                         | <b>Test_Accuracy</b> | <b>Val_Accuracy</b> | <b>Precision</b> | <b>Recall</b> | <b>F1_Score</b> |
|-------------------------|----------------------|---------------------|------------------|---------------|-----------------|
| 20 validation patience  |                      |                     |                  |               |                 |
| squeezenet              | 0.9125               | 0.913580247         | 0.913095         | 0.916753      | 0.914921        |
| googlenet               | 0.9375               | 0.950617284         | 0.936842         | 0.946842      | 0.941816        |
| resnet18                | 0.95                 | 0.950617284         | 0.949342         | 0.953261      | 0.951297        |
| mobilenetv2             | 0.925                | 0.962962963         | 0.926786         | 0.928409      | 0.927597        |
| resnet50                | 0.9375               | 0.925925926         | 0.9375           | 0.944022      | 0.94075         |
| 40 validation patience  |                      |                     |                  |               |                 |
| squeezenet              | 0.875                | 0.888888889         | 0.87619          | 0.896101      | 0.886034        |
| googlenet               | 0.925                | 0.962962963         | 0.924342         | 0.938765      | 0.931498        |
| resnet18                | 0.95                 | 0.962962963         | 0.950595         | 0.95202       | 0.951307        |
| mobilenetv2             | 0.9125               | 0.950617284         | 0.91369          | 0.921294      | 0.917477        |
| resnet50                | 0.975                | 0.987654321         | 0.975595         | 0.97619       | 0.975893        |
| 60 validation patience  |                      |                     |                  |               |                 |
| squeezenet              | 0.9625               | 0.987654321         | 0.963095         | 0.963033      | 0.963064        |
| googlenet               | 0.925                | 0.913580247         | 0.924342         | 0.931783      | 0.928047        |
| resnet18                | 0.925                | 0.925925926         | 0.925595         | 0.936012      | 0.930774        |
| mobilenetv2             | 0.9625               | 0.987654321         | 0.963095         | 0.963033      | 0.963064        |
| resnet50                | 0.95                 | 0.987654321         | 0.950595         | 0.956522      | 0.953549        |
| 80 validation patience  |                      |                     |                  |               |                 |
| squeezenet              | 0.9                  | 0.950617284         | 0.9              | 0.916667      | 0.908257        |
| googlenet               | 0.9375               | 0.925925926         | 0.9375           | 0.94494       | 0.941206        |
| resnet18                | 0.95                 | 0.987654321         | 0.950595         | 0.953409      | 0.952           |
| mobilenetv2             | 0.9625               | 0.962962963         | 0.963095         | 0.963033      | 0.963064        |
| resnet50                | 0.975                | 0.987654321         | 0.975            | 0.97619       | 0.975595        |
| 100 validation patience |                      |                     |                  |               |                 |
| squeezenet              | 0.95                 | 0.950617284         | 0.95             | 0.956522      | 0.95325         |
| googlenet               | 0.925                | 0.938271605         | 0.925            | 0.934659      | 0.929804        |
| resnet18                | 0.975                | 1                   | 0.975595         | 0.975         | 0.975298        |
| mobilenetv2             | 0.9625               | 0.962962963         | 0.963095         | 0.963033      | 0.963064        |
| resnet50                | 0.975                | 0.962962963         | 0.975            | 0.97619       | 0.975595        |
| 120 validation patience |                      |                     |                  |               |                 |
| squeezenet              | 0.925                | 0.925925926         | 0.92619          | 0.933794      | 0.929977        |
| googlenet               | 0.975                | 0.938271605         | 0.975            | 0.97619       | 0.975595        |
| resnet18                | 0.9625               | 1                   | 0.9625           | 0.965909      | 0.964202        |
| mobilenetv2             | 0.9375               | 0.950617284         | 0.93869          | 0.940115      | 0.939402        |
| resnet50                | 0.975                | 0.962962963         | 0.975            | 0.97619       | 0.975595        |
| 140 validation patience |                      |                     |                  |               |                 |
| squeezenet              | 0.975                | 0.987654321         | 0.97619          | 0.977273      | 0.976731        |
| googlenet               | 0.9875               | 0.962962963         | 0.9875           | 0.9875        | 0.9875          |
| resnet18                | 1                    | 1                   | 1                | 1             | 1               |
| mobilenetv2             | 0.925                | 0.987654321         | 0.92619          | 0.929911      | 0.928047        |
| resnet50                | 0.975                | 0.975308642         | 0.975595         | 0.97619       | 0.975893        |
